# Supplementary material for: Genome-Wide Identification and Characterization of the PHT1 Gene Family and Its Response to Mycorrhizal Symbiosis in Salvia miltiorrhiza under Phosphate Stress
Source: MDPI journal article supplement (doi:10.3390/genes15050589), 2024-05-06
Supplement: s1 [file s1]

**Table S2** Protein sequences of PHT1 in *Salvia miltiorrhiza*, *Arabidopsis thaliana*, and *Oryza sativus*

***Salvia miltiorrhiza***

>SmPHT1;1

MAGDNNLKVLNALDMAKTQWYHFTAIHAGMGFFTDAYDLFCISLVTKMLGR  
IYYHVEGSPKPGSLPPNVSAAVNGVALCGTLAQQLFFGWLGDKLGRKKVYGL  
TLMVMCICSIASGLSFGRDAKAVMATLCFFRFWLGFGIGGDYPLSATIMSEYA  
NKKTRGAFIAAVFAMQGFILAGGIFAMTLAIFDATFKSPPYEVDPSASTIPQA  
DYLWRIVLMVGALPALLTFYWRLKMPETARYTALVAKDAKRAAADMAKVL  
QADIEAEQHKAEAMASRQEGYDLFSKEFLHRHGSLLGTTSTWFLLDIAFY  
QNLFQKDIFTAIGWIPPAKTMNAIHEVYTISRATLIALCSTVPGYWFTVALID  
VIGRFTIQLGGFFFMVFMFALAIPYNHWTQPEHRIGFVVMYSLTFFFANFGPN  
ATTFVVPAEIFPARFRSTCHGISAASGKLGAIVGAFGFQILAQSQDPKKVDVGY  
HPGIGVKNLSLVLGVNLLGLLFTFLVPEAKGKSLEDLSGENEEATD

>SmPHT1;2

MAKKQLEVLNALDVAKTQWYHFTAIVHAGMGFFTDAYDLFCISLVTKLLGRL  
YYTVEGAEKPGSLPPNVAAAVNGVAFCGTLTGQLFFGWLGDKLGRKKVYGM  
TLMMMVICSIASGLSLGSRPKAVMATLCFFRFWLGFGIGGDYPLSATIMSEYA  
NKKTRGAFIAAVFAMQGFILAGGMVAIIMSSAFKAAYPAPAYEVDPAASLPA  
ASDYVWRLIVMFGALPAALTYWRMKMPETARYTALVAKNAKQAAADMSR  
VLQVDLEAEPERVVEEKGKQFGLFSKEFLRRHGLHLLGTTSTWFLLDIAFY  
SQNLFQKDIFSAIGWIPAAKTMNALEEVFRIARAQTLIALCSTVPGYWFTVVFIDR  
IGRFAIQIMGFTMMTIFMFALAIPYDHWTHKDNRIGFVIMYSLTFFFANFGPNA  
TTFVVPAEIFPARFRSTCHGISSAAGKAGAMVGAFGLYAAQSKDPKKTDAGY  
PAGIGVRNSLLVLGCVNALGVMFTFLVPESNGKSLEEMSRENNENENENENVE  
MGDVRDARTVPL

>SmPHT1;3

MASSGGSVLATLDSSKTQWYHYKAVIVSGMGFFTDAYDLFCISLLTKLLGRIY  
YHVPSSPKPGVLPPSVAAAVNGVALCGTLLGQLFFGLLGDRLGRKKVYGLTLV  
IMAFCSIASGLSFGSSPKSVMATLCFFRFWLGFGIGGDYPLSATIMAEYANKKT  
RGSFIAAVFAMQGFILTGGLVGMASAAFRVCVAAPPYSVDPVGPSTPEADY  
VWRIVLMLGALPAVLSYYWRMKLPETARYTALVAKDTEKACRDMEKVLKVG  
IEAAAPESSESDKNSFGLISKEFLWRHGVHLIGTASAWFLIDITYYSQNLFQKE  
IFTAVGWLPAAKTMSALDEVFKISLAQFLIALCGTVPGYWATVALIDRIGRFWI  
QAQGFLMLTMVFMVALAVPYHHWTLNKAGFLVMYALTFFFANFGPNSTTFIVA  
AEIFPARLRSTCHGISAAAGKAGAIVGAFGLYAAQNQDGRKTDAGYPSGIGIR  
NSLFILAGINMLGLLATFLVPEPKGRSLEDISQEQQRHQESQV

>SmPHT1;4

MALKVLSALDSAKTQFYHFKAIIVAGMGLFTDAYDLFCLPPIKLLGRIYYPNR  
EVPAAVSSAMVAAALLGAVAGNLVFGHLGDRIGRRRVYGLSLLLMVLSSVSC  
GFSACTSRSCVLLTLGIFRFALGVGIGGDYPLSATIMSEFANRRTRGSFIAAVFS  
MQGFGILVSSTVTMAVCAAFDSATRAPPDGETPLAADLAWRLILVFAAVPAAL  
TYYWRMMMPETARYTALVERNVEQAVRDMQRVLAVALSQAEEEEETLSPNTA  
APSRPKPYPLLSCEFLRRHGRDLFACAAAWFLVDVVFYSSNLFQSKIYGRYLP

KAPMNAFQEAFHVAKLQAIIVSSTIPGYAAVYFIDRAGRVKIQMSGFFFMAL  
GLLAIGIPYQKYWRNTTNMGFMILYSLTFFFANFGPNTTTFIVPAELFPARFRST  
CHGISGAAGKVGAIVGSVGFLWASSSGGGEGMTAALVILGGVCVAGMVVTYL  
FTPETMGRSLEENESEDDINNAPCIPSQSSAIANSN

>SmPHT1;5

MADDKNLKVLNALDMAKTQWYHFTAIHAGMGFFTDAYDLFCISLVTKMLGR  
IYYYVEGSPKPGSLPPNVSAAVNGVALCGTLAQQLFFGWLGDKMGRKKVYG  
LTLMVMCICSIGSGLSFRDAKGVMTTLCFFRFWLGFGIGGDYPLSATIMSEY  
ANKKTRGAFIAAVFAMQGGFGLGGGIFAMMLSAIFDAAFKSPPYEVDPAASTIP  
QADYLWRIVLMVGALPALLTFYWRLKMPETARYTALVAKDAKRAAADMAK  
VLQADIEAEQHKAEAMASRHASYSLSKEFLRRHGSHLLGTTSTWFLLDIAFY  
SQNLFQKDIFTAIGWIPPAKTMNAINEVYTIGRAQTLIAICSTVPGYWFTVALID  
VIGRFTIQLGGFFFMVTFMFALAIPTYDHWTPPEHRIGFVVMYSLTFFFANFGPN  
ATTFVVPAEIFPARFRSTCHGISAASGKLGAIVGAFGFQLLAQSQDPKKVDAGY  
HPGIGVKNSLIALGVVNLLGLLFTFLPEAKGKSLEDLSGENEEATD

>SmPHT1;6

MASNSISVLNALDNARTQWYHVTAIVIAGMGFFTDAYDLFCISTVSKLLGRLY  
YYDPTTGKPGKLPFRVNNMVIGVALVGTLTGQLVFGYLGDKLGRKKVYGITL  
ILMASCAICSGLSFGYSPKAVMGTLCCFFRFWLGFGIGGDYPLSATIMSEYANKK  
TRGAFIAAVFAMQGVGIIFAGLVSMIISRVFLGMYAGPAFSQEHVFSTEPEADH  
VWRIVLMIGALPAVLTFYWRMKMPETGRYTALIEGNAKQAAADMGRVLDIEI  
NAEQEKIAQFNSANEYKLFSSFEFFARHGKHLIGTATTWFLLDIAFYSQLTQKD  
IFPVMGLTQDPTKVSALREMFETSRAMFVIALFGTFPGYWFTVAFIEKIGRFYI  
QLVGFFMMSVFMFIIGVKYDYLKDKDHWTFALYGLTFFFANFGPNSTTFV  
LPAELFPTRVVRSTCHALSAASGKAGAMIGAFGIQNYTQDGKVKEIRKAMIILAI  
TNLMGFAFTFLLTETKGRSLEEISGEDAGCGDAGWGEERPDNKEDASRNG

>SmPHT1;7

MGSRENLQVLDALDTAKTQLYHFTTIVIAGMGFFTDAYDLFSISLITKLLGRIY  
YTTNLNAPKPGTLPPKISSAVTGVALVGTLAGQLFFGWLGDKMGRKKVYGLT  
LILMIVCSLASGLSFGKSPKGVMTLCFFRFWLGFGIGGDYPLSATIMSEYANK  
KTRGAFIAAVFAMQGGFILTSGIVALAVSAAFDHAYSAPSYAADPARSTVDQA  
DYIWRIIVMFGALPAALTFYWRMKMPETARYTALVARNAKQAARDMARVLN  
VELAAEEEEKVERYADRTSNSFGLFSKEFLRRHGMHLLGTTSTWFLLDIAFYSN  
NLFQKDIFTAVGWIPKPMETMNAVHEVFRVARAQTALVALFATVPGYWFTVIFIDII  
GRFAIQIMGFFFMVTFMFALAIPTYDHWTHKENRIGFVVMYSLTFFFANFGPNA  
TTFVVPAEIFPARLRSTCHGISAAAGKAGAIIGAFGLYAAQPKEESKRDKGYP  
AGIGIKNSLIVLGCNVNLLGLLFTFLVPEAKGKSLEEMSGENETDDYEQTAECD  
ASKGTPPPPA

>SmPHT1;8

MAREQLQVLNALDVAKTQLYHFTAIIVVAGMGFFTDAYDLFSISLIAKLLGRIY  
YTVPGALKPGTLPTVSSSVTGVALVGTLSGQLFFGWLGDKMGRKKVYGMT  
LLIMIVCSIASGLSFGNSPKGVMTTLCCFFRFWLGFGIGGDYPLSATIMAEYANK  
KTRGAFVAAVFAMQGGFGLFGGIISLIVSAAFDHAYKSPTYERDAAASTPPQAD  
YVWRIILMFGALPAALTFYWRMKMPETARYTALVAKNAKQAAQDMGRVLNV

ELEVEEEKVERQQKGNNFGLLSKEFLKRHGLHLFGTTSTWFLLDIAFYSQLF  
QKDVFSAGWIPPAKTMNAIGEVYKISKAQTLALCSTVPGYWFTVFFIDIIGR  
FAIQMMGFFFMVTFMFAVAIPYDHWTKKDNRIGFVVMYGLTFFFANFGPNATT  
FVVPAEIFPARLRSTCHGISAAAGKAGAIVGAYGFLYAAQSKDKTKTDHGFPF  
GIGVKNALIVLGVINFLGMLCTLAVPEAKGKSLEEASQENIEESNEQGA

>SmPHT1;9

MARQQMQVLTALDSAKTQWYHFTAIVIAGMGFFTDAYDLFCISLVTKLLGRI  
YYHRDGAANPGTLPPNVSSAVNGVAFCGTLAGQLFFGWLGDKLGRKRVYGM  
TLMLMISSAASGLSFGATPKAVMATLCFSRFLGFGIGGDYPLSATIMSEYAN  
KKTRGAFVAAVFAMQGGFILTGGMVAIAVAAFEAAFPAPAYEHGGGASTVPE  
ADYAWRVILMFGALPAALTYYWRAKMPETARYTALVARNAKRAAADMSKVL  
QVEIEAEPEKMNDSTNAFGLFSKQFLRRHGLHLLGTTTTWFLLDIAFYSQLF  
QKDIFTAIGWTPPPKTMNAMEEMYRIARAQTLIALCSTVPGYWFTVVFIDRIG  
RFAIQFMGFFFMATFMAFAIPYDHWTRSENIGFVIMYSLTFFFANFGPNATT  
FVVPAEIFPARLRATCHGISAAAGKVGAMVGAFGFLYAAQPREAGKAEAGYP  
AGMGVRNALMVLGCVNALGMALTLLVPESKGRSLEEMSMENEEELQREIRT  
VPV

### *Arabidopsis thaliana*

>AtPHT1;1

MAEQQLGVLKALDVAKTQLYHFTAIVIAGMGFFTDAYDLFCVSLVTKLLGRIY  
YFNPESAKPGSLPPHVAAAVNGVALCGTLGQLFFGWLGDKLGRKKVYGLTL  
VMMILCSVASGLSFGHEAKGVMTTLCFFRFLGFGIGGDYPLSATIMSEYANK  
KTRGAFIAAVFAMQGVGILAGGFVALAVSSIFDKKFPAPTYAVNRALSTPPQVD  
YIWRIIVMFGALPAALTYYWRMKMPETARYTALVAKNIKQATADMSKVLQTD  
IELEERVEDDVKDPKQNYGLFSKEFLRRHGLHLLGTTSTWFLLDIAFYSQLF  
QKDIFFSAIGWIPKAATMNATHEVFRIARAQTLIALCSTVPGYWFTVAFIDTIGRF  
KIQLNGFFMMTVFMFAIAFPYNHWIKPENRIGFVVMYSLTFFFANFGPNATTFI  
VPAEIFPARLRSTCHGISAAAGKAGAIVGAFGLYAAQSQDKAKVDAGYPPGI  
GVKNSLIMLGVLNFIGMLFTFLVPEPKGKSLEELSGEAEVSHDEK

>AtPHT1;2

MAEQQLGVLKALDVAKTQLYHFTAIVIAGMGFFTDAYDLFCVSLVTKLLGRIY  
YFNPESAKPGSLPPHVAAAVNGVALCGTLGQLFFGWLGDKLGRKKVYGLTL  
IMMILCSVASGLSFGNEAKGVMTTLCFFRFLGFGIGGDYPLSATIMSEYANK  
KTRGAFIAAVFAMQGVGILAGGFVALAVSSIFDKKFPAPTYAVNRALSTPPQVD  
YIWRIIVMFGALPAALTYYWRMKMPETARYTALVAKNIKQATADMSKVLQTD  
IELEERVEDDVKDPRQNYGLFSKEFLRRHGLHLLGTTSTWFLLDIAFYSQLF  
QKDIFFSAIGWIPKAATMNATHEVFRIARAQTLIALCSTVPGYWFTVAFIDTIGRF  
KIQLNGFFMMTVFMFAIAFPYNHWIKPENRIGFVVMYSLTFFFANFGPNATTFI  
VPAEIFPARLRSTCHGISAAAGKAGAIIGAFGFLYAAQNQDKAKVDAGYPPGIG  
VKNSLIVLGVLNFIGMLFTFLVPEPKGKSLEELSGEAEVSHDEK

>AtPHT1;3

MADQQLGVLKALDVAKTQLYHFTAIVIAGMGFFTDAYDLFCVSLVTKLLGRL  
YYFNPTSAPKPGSLPPHVAAAVNGVALCGTLGQLFFGWLGDKLGRKKVYGIT

LIMMILCSVASGLSLGNSAKGVMTTLCFFRFWLGFGLGGDYPLSATIMSEYAN  
KKTRGAFIAAVFAMQGVGILAGGFVALAVSSIFDKKFPSPTYEQDRFLSTPPQA  
DYIWRIIVMFGALPAALTYYYWRMKMPETARYTALVAKNIKQATADMSKVLQT  
DLELEERVEDDVKDPKKNYGLFSKEFLRRHGLHLLGTTSTWFLLDIAFYSQL  
FQKDIFSAIGWIPKAATMNAIHEVFKIARAQTLIALCSTVPGYWFTVAFIDIIGR  
FAIQLMGFFMMTVFMFAIAFPYNHWILPDNRIGFVVMYSLTFFFANFGPNATTF  
IVPAEIFPARLRSTCHGISAATGKAGAIVGAFGFLYAAQPQDKTKTDAGYPPGI  
GVKNSLIMLGVINFGMLFTFLVPEPKGKSLEELSGEAEVDK

>AtPHT1;4

MAREQLQVLNALDVAKTQWYHFTAIIIAGMGFFTDAYDLFCISLVTKLLGRIY  
YHVEGAQKPGTLPPNVAAAVNGVAFCGTLAGQLFFGWLGDKLGRKKVYGM  
TLMVMVLCSIASGLSFGHEPKAVMATLCFFRFWLGFGLGGDYPLSATIMSEYA  
NKKTRGAFVS AVFAMQGF GIMAGGIFAIIISSAFEAKFPSPAYADDALGSTIPQA  
DLVWRIILMAGAIPAAMTYYSRSKMPETARYTALVAKDAKQAASDMSKVLQV  
EIEPEQQKLEEISKEKSKAFGLFSKEFMSRHGLHLLGTTSTWFLLDIAFYSQL  
FQKDIFSAIGWIPPAQSMNAIQEVFKIARAQTLIALCSTVPGYWFTVAFIDVIGR  
FAIQMMGFFFM TVFMFALAI PYNH WTHKENRIGFVIMYSLTFFFANFGPNATT  
FVVP AEIFPARFRSTCHGISAASGKLGAMVGAFGFLYLAQNPDKDKTDAGYPP  
GIGVRNSLIVLG VVNFLGILFTFLVPESKKGKSLEEMSGENEDNENSNNDSRTVP  
IV

>AtPHT1;5

MAKKGKEVLNALDAAKTQMYHFTAI VIAGMGFFTDAYDLFSISLVTKLLGRI  
YYHVDSSKKPGTLPPNVAAAVNGVAFCGTLAGQLFFGWLGDKLGRKKVYGI  
TLMMLVLC SLGSGLSFGHSANGVMATLCFFRFWLGFGLGGDYPLSATIMSEYA  
NKKTRGAFIAAVFAMQGF GILAGGIVSLIVSSTFDHAFKAPTYEVD PVGSTVPQ  
ADYVWRIVLMFGAIPALLTYYYWRMKMPETARYTALVARNTKQAASDMSKVL  
QVDLIAEEEEAQSNSSNPNTFGLFTREFARRHGLHLLGTTTTWFLLDIAYYS  
SNLFQKDIYTAIGWIPAAETMNAIHEVFTVSKAQTLIALCGTVPGYWFTVAFID  
ILGRFFIQLMGFIFMTIFMFALAI PYDHW RHREN RIGFLIMYSLTMFFANFGPNA  
TTFVVP AEIFPARLRSTCHGISAASGKAGAIVGAFGFLYAAQSSDSEKTDAGYP  
PGIGVRNSLLMLACVNFLGIVFTLLVPESKKGKSLEEISREDEEQSGGDTVVEMT  
VANSGRKVPV

>AtPHT1;6

MANEEQGSILKALDVAKTQWYHVTAVV VSGMGFFTDSYDLFVISLITKLLGRI  
YYQVPGSSSPGSLPDGISAAVSGVAFAGTFIGQIFFGCLGDKLGRKRVYGLTLLI  
MTICSICSLSLGRDPKTVMTLCFFRFWLGFGLGGDYPLSATIMSEYSNKRTR  
GAFIAAVFGMQGIGILAAGAVSLLVSAVFESKFPSRAYILDGAASTVPQADYV  
WRIILMV GALPALLTYYYWRMKMPETARYTALVSKNAEQAAALDMTKVLNVDI  
EASAAKNDQARVSSDEFGLFSMKFLRRHGLHLLGTASTWFLLDIAFYSQLF  
QKDIFTTIGWLPSAKTMNAIQELYMIAKAQTIIACCSTVPGYFFTVGFIDYMGR  
KKIQIMGFAMMTIFMLS LAIPYHHWTL PANRIGFVVLYSFTFFFSNFGPNATTFI  
VPAEIFPARIRSTCHGISAASGKAGAMVGSFGFSALVKALGMSNTLYIMAGINL  
LGLLLTFTIPETNGKSLEELSGETEPEKIKEKIVV

>AtPHT1;7

MAGDQLNVLNALDVAKTQWYHFTAIHAGMGFFTDAYDLFCISLVTKLLGRIY  
YHVDGSEKPGTLPPNVSAAVNGVAFCGTLAGQLFFGWLGDKLGRKKVYGMT  
LMVMVLCASIAGLSFGSNPKTVMTTLCFFRFWLGFGLGGDYPLSATIMSEYAN  
KKTRGAFIAAVFAMQGFILTGIFAIIVSAAFEAKFPAPTYQIDALASTVPQAD  
YVWRIILMVGALPAAMTYYSRSKMPETARYTALVAKDAKLAASNMSKVLQV  
EIEAEQQGTEDKSNSFGLFSKEFMKRHGLHLLGTTSTWFLLDIAFYSQLFQK  
DIFSAIGWIPPAQTMNAIQEVFKIARAQTLIALCSTVPGYWFTVAFIDVIGRFAI  
QMMGFFFMFTVFMFALAIPYDHWTHKENRIGFVAMYSLTFFFANFGPNATTFV  
VPAEIFPARFRSTCHGISAASGKLGAMVGAFGLYLAQSPDKTKTEHGYPPGIG  
VKNSLIVLGVVNLGGMVFTLLVPESKKGKSLEEMSGENEQNDESSSSSSNNNSNN  
AVSTA

>AtPHT1;8

MKMTKRLINRYKDPCSVSLIMNSKFRYNKPKGKKQKKKKKALDSESIKKPT  
MPIKVLSSLDVARTQWYHFKAIIVAGMGLFTDAYDLFCIAPVMKMISHVYYN  
GDSINTAVLSTSYAIALLGATGQLVFGYLGDRVGRRRVYGLCLIIMILSSFGCG  
FSVCTTRRSCVMVSLGFFRFLGLGIGGDYPLSATIMSEFANKRTRGAFIAAVF  
SMQGLGILVSSAVTMAVCVAFKRSGGLEVDAAAPTEADLAWRLILMIGALP  
AALTFYWRMLMPETARYTALVENNIVQAAKDMQRVMSRSHISDEATDPPPP  
PPPPSYKLFSRCFFRLHGRDLFAASFNWFLVDIVFYTSNLLLSHIFSHYSKKPST  
AENVYDAAFEVAELGAIACSTIPGYWFTVYFIDKIGRVKIQIMGFFFMAYIYL  
VAGIPYSWYWSKHEHNNKGFMVLYGLVFFFCNFGPNTTTFIIPAEHFPARFRST  
CHGISGAAGKLGAIVGTVGFLWATKKMESDDKNQIYPEVNRMRI AFLILGGV  
CIAGILVTYFFTKETMGRSLEENEHDQDNNAESEDEPQIVDGQSSVSTLLQTR

>AtPHT1;9

MEPILLSALDAARIQWYHFKAIIVAGMGLFTDAYDLFCIAPIMKMISQIYYH  
KDSIGTALLSTSYAIALLGATGQLIFGYLGDRVGRRKVYGLSLLIMVFSSFGC  
GFSVCTTRRSCVMVSLGFFRFVLGLGIGGDYPLSATIMSEFANKRTRGAFIAAV  
FSMQGLGILMSSAVTMVVCLAFKNAGEGSSEKTNVAGLET LAPPESDIAWRLI  
LMIGALPAALTFYWRMLMPETARYTALVENNVVQAAKDMQRVMSVSMISQI  
TEDSSSELEQPPSSSSYKLFSRRFLSLHGRDLFAASANWFLVDVVFYTSNLLLS  
QIFNFSNKPLNSTNVYDSAFEVAKLAAIVAACSTIPGYWFTVYFIDKIGRVKIQ  
MMGFFLMAVVYLVAGIPYSWYWSKHEKTNKGFMVLYGLIFFFSNFGPNTTTF  
IIPAEHFPARFRSTCHGISGAAGKFGAIVGTVGFLWATRHHEEDGFDPVKRVRIA  
FLILGGVCIAGMIVTYLFTRET MGRSLEENEDEIVSTSAGSSPANELLRRQY

### *Oryza sativa*

>OsPHT1;1

MAGGQLNVLSTLDQAKTQWYHFMAIIVAGMGFFTDAYDLFCISLVTKLLGRI  
YYTDDSKDTPGALPPNVSAAVTGVALCGTLAGQLFFGWLGDKLGRKSVYGF  
TLILMVVCSVASGLSFGSSAKGVVSTLCFFRFWLGFGLGGDYPLSATIMSEYAN  
KRTRGAFIAAVFAMQGFILFGAIVALAVSAGFRHAYPAPSYSDNHAASLVPQA  
DYVWRIILMFGTVPAALTYWRMKMPETARYTALIARNAKQAAADMSKVLH  
TQIEESADRAETVAVGGESWGLFSRQFLRRHGLHLLATTSTWFLLDIAFYSQL  
LFQKDIFSKVGWIPPAKTMNALEELYRIARAQALIALCGTIPGYWFTVAFIEIM

GRFWIQIMGFAMMTAFMLGLAIPYHHWTTPGHHTGFIVMYGFTFFFANFGPN  
STTFIVPAEIYPARLRSTCHGISAAAGKAGAIIGAFGFLYAAQDQHKPEPGYPRG  
IGIKNALFVLAGTNFLGTIMTLLVPESKGMSLEVISQEVDGDDEEAAYPK  
>OsPHT1;2

MAGSQLNVLVKLDQAKTQWYHFMAIIVIAGMGFFTDAYDLFCIALVTKLLGR  
LYYTDITKPNPGTLPPNVSSAVTGVALCGTLAGQLFFGWLGDKLGRKSVYGFT  
LILMVVCSIASGLSFGHTPKSVIATLCFFRFWLGFVGIGGDYPLSATIMSEYASKK  
TRGAFIAAVFAMQGFILFGAIVALVVSAGFRHAYPAPSYAQNPAAASLAPQAD  
YTWRLILMFGTIPAGLTYYWRMKMPETARYTALVARNAKQAAADMSKVLHA  
EIEERPEVVESQVVAGETWGLFSRQFMKRHGMHLLATTSTWFLLDIAFYSQL  
FQKDIFSKVGWIPPAKTMNALEELYRISRAQALIALCGTIPGYWFTVAFIDIVGR  
FWIQIMGFFMMTVFMLALGVDPYDHWTHPAHHTGFVVLYALTFFFANFGPNST  
TFIVPAEIFPARLRSTCHGISAASGKAGAIIGAFGFLYAAQDQHNPdagysrgig  
IRNALFVLAGTNFLGMLMTLLVPESKGLSLEEMSKDNVDETAQEIAQA  
>OsPHT1;3

MADGQLKVLTTLDHARTQWYHFMAIIVIAGMGFFTDAYDLFCISLVSKLLGRI  
YYTDLAGDNPGLPPNVSAAVNGVALCGTLAGQLFFGWLGDKLGRKSVYGF  
TLVLMVVCSVASGLSFGRTAKGVVATLCFFRFWLGFVGIGGDYPLSATIMSEYA  
NKRTRGAFIAAVFAMQGFILFGAIVALVVSAGFRNAYPAPSYADGRAASLVPE  
ADYVWRIILMFGTVPAAALTYYYWRMKMPETARYTALIARNAKQAAADMSKVL  
DTEIQEDADRAEAVAAGGAGNEWGLFSRQFVRRHGVHLVATTSTWFLLDIAF  
YSQNLfQKDIFSKVGWIPPARTMNAVEEVFRIARAQALIALCGTIPGYWFTVAF  
IDVAGRFAIQLMGFAMMTVFMLGLAAPYHHWTTPGNHTGFVVMYGFTFFFA  
NFGPNATTfIVPAEIYPARLRSTCHGISAAAGKAGAIvGAFGFLYAAQDPHKPE  
AGYKPGIGIRNALFVLAGTNFLGMLMTLLVPESKGMSLEEVSKENVADDEEA  
TA

>OsPHT1;4

MAGELKVLNALDSAKTQWYHFTAIVIAGMGFFTDAYDLFSISLVTKLLGRIYY  
FNPASKSPGSLPPNVSAAVNGVAFcGTLAGQLFFGWLGDKMGRKKVYGMTL  
MLMVICCLASGLSFGSSAKGVMATLCFFRFWLGFVGIGGDYPLSATIMSEYANK  
RTRGAFIAAVFAMQGFgnLTGGIVAIIVSAAFKSRFDAPAYRDDRTGSTVPQAD  
YAWRIVLMFGAIPALLTYYYWRMKMPETARYTALVAKNAKQAAADMTQVLNV  
EIVEEQEKADEVARREQFGLFSRQFLRRHGRHLLGTTVCWFVLDIAFYSSNLF  
QKDIYTAVQWLPKADTMSALEEMFKISRAQTLVALCGTIPGYWFTVFFIDIIGR  
FVIQLGGFFFMtAFMLGLAVPYHHWTTPGNHIGFVVMYAFTFFFANFGPNSTT  
FIVPAEIFPARLRSTCHGISAAAGKAGAIvGSFGFLYAAQSTDASKTDAGYPPGI  
GVRNSLFFLAGCNVIGFFFTFLVPESKGKSLEELSGENEDDDDVPEAPATADHR  
TAPAPPA

>OsPHT1;5

MVQDRKVLDAldTAKTQWYHFTAVVIAGMGFFTDAYDLFSISLVTKLLGRIY  
YFNPASKSPGSLPPNVSAAVNGVAFcGTLAGQLFFGWLGDKMGRKKVYGMT  
LMLMVICCLASGLSFGSSAKGVMATLCFFRFWLGFVGIGGDYPLSATIMSEYAN  
KRTRGAFIAAVFAMQGFgnLTGGIVAIIVSAAFKLRFDAPAYRDDRAGSTVPQ  
ADYAWRIVLMFGAIPALLTYYYWRMKMPETARYTALVAKNDKKAAADMARVL

NVELVDEQEKA AAAATAAAAEEEEAAARREQYGLFSREFARRHGHLLGTTVCW  
FVLDIAYYSQNL FQKDIYTAVQWLPKADTMSALEEMFKISRAQTLVALCGTIP  
GYWFTVLFIDIVGRFAIQLGGFFLMTAFMLGLAVPYHHWTPGNHVGFFVVMY  
AFTFFFANFGPNSTTFIVPAEIFPARLRSTCHGISSAAGKMGAIVGSFGFLYAAQ  
STDPSKTDAGYPRGIGVRNSLFLLAGCNVVGFLFTFLVPESKGKSLEELSGENE  
MEAEPAAATNSYRQTVPDSGQSE

>OsPHT1;6

MGGGGGEQQQLEVLHALDVAKTQWYHFTAIVVAGMGFFTDAYDLFCISLVT  
KLLGRIYYRVDGSPSPGTLPPHVSASVNGVAFVGTLSGQLFFGWLGDKLGRK  
RVYGITLMLMVLCSLASALSFGHTPTSVMATLCFFRFWLGFGIGGDYPLSATI  
MSEYANKKTRGAFIAAVFAMQGFGIITGGLVAILVSASFRAAFPAPPYGEDPVA  
STPPQAD FVWRIILMLGALPAALTYYWRTKMPETARYTALVANNAKQAAAD  
MSKVLQVVEMRNIGNNGGSRPFGFLFSGEFVRRHGLHLVGTSATWLLLDIAF  
YSQNL FQKDIFSAVGWIPKAATMSALEELFRIARAQTLIALCGTVPGYWFTVA  
LIDVVGRFKIQAVGFFMMTLFMLTLALPYHHWTAPGKNHVGFLLLYGLTFFFA  
NFGPNSTTFIVPAEIFPARLRATCHGISAASGKLGAIVGSFGFLYLAQSPDRSKT  
EHGYPPGIGVRNSLFLLAACNLLGLLFTFLVPESKGKSLEEMSGDAEAQEEAP  
PPLQTVL

>OsPHT1;7

MAGDQMHVLSALDSAKTQWYHFTAIVIAGMGFFTDAYDLFCISLVTKLIGRV  
YYTADGASKPGSLPPNVSAAVNGVAFVGTLTGQLFFGWLGDRVGRKSVYGM  
TLLMIIICSVASGLSFGDTPTSVMATLCFFRFWLGFGIGGDYPLSATIMSEYAN  
KRTRGAFIAAVFAMQGFILAGGAVAIGITAIFRSRFPAPPFAADPAASTPPQAD  
YVWRLILMFGALPAALTFYWRMRMPETARYTAIVAKNAERAAADMSKVLQV  
KITAEQAEMASPVDPFTSKPFGFLFSGEFARRHGFHLLGTTSTWLLLDIAYYSQ  
NL FQKDIFSAIGWIPEAKTMSALDELYHIARAQTLIALCGTVPGYWFTVALIDV  
VGRFKIQAAAGFFVMTAFMLALAVPYDHWTAAGNQIGFVVLYALTTFFANFGP  
NATTFIVPAEIYPARLRATCHGISAASGKVGAIVGSFGFLYLAQSPVPAKAAAH  
GYPPGIGVRNSLFALAGCSLLGFLLTFLVPEPKGKSLEEMSRENEVGQP

>OsPHT1;8

MARQEQQHLQVLSALDAAKTQWYHFTAIVVAGMGFFTDAYDLFCISLVTKL  
LGRIYYTDLAKENPGSLPPNVAAAVNGVAFCGTLAGQLFFGWLGDKLGRKSV  
YGMTLLMMVICSIASGLSFSHTPTSVMATLCFFRFWLGFGIGGDYPLSATIMSE  
YANKKTRGAFIAAVFAMQGFILAGGIVTLIISAFRAGFPAPAYQDDRAGSTV  
RQADYVWRIILMLGAMPALLTYYWRMKMPETARYTALVAKNAKQAAADMS  
KVLQVEIQEEQDKLEQMVTRNSSSFGFLFSRQFARRHGLHLVGTTWFLLDIA  
FYSQNL FQKDIFTSINWIPKAKTMSALEEVFRIARAQTLIALCGTVPGYWFTVF  
LIDIVGRFAIQLLGGFFMMTVFMLGLAVPYHHWTTKGNHIGFVVMYAFTFFFAN  
FGPNSTTFIVPAEIFPARLRSTCHGISAAAGKAGAIIGSFGFLYAAQDPHKPDAG  
YKPGIGVRNSLFLVLAGCNLLGFICTFLVPESKGKSLEEMSGEAEDDDDEVAAA  
GGGAAVRPQTA

>OsPHT1;9

MAPRIRVLAALDQARTQYYHFKAIVIAGMGLFTDSYDLFCISPVMKIFGRVYY  
APSGSVDGSGSGPGVTPPAVVSATVGVALLGAVAGNVVFGALGDRVGRRRVY

GACLLLMVCSSVGSGLSVCRTRRCALASLCFFRFLLGVGVGVDYPLSATIMSE  
FANRRTRGAFIAAVFSMQGFGILVSSAVTMAVAAAFDHYTGYPAPLDTPECAD  
LAWRIILMAGAVPAALTYWRMSMPETARYTALVERDVVKATNDIGRVLADL  
DLAAVAEEEEVAAAALSPPPVTPPPPRPSYGLFSRRFVRQHGRDLFACAAAWF  
LLDIPYYSSTLFQSQIYRPWFPPAAKVNAFQEA FNVAKFQAVIAVASTIPGYFAA  
MLLIERAGRRLQ MAGFLLMAVFLFALAGPYDGYWRDHAKTAGYIVLYSLTF  
FSANLGPNTTTFILPAELFPARFRSTCHGLSGAAGKLGALVGSIGFLWASQQKD  
GAAAGHLP GIGMMYALFVLGGICLLGLALTYAFTPETMTRSLEENESSVQAQS  
QVGDDGSDAGNGSDGLRFHELNVLMEAATKSPVSMASSHLSMSPILPHRMSL  
>OsPHT1;10

MAPIGVLTALDQARTQYYHFKAIVIAGMGLFTDSYDLFCIAPVMKIVGRVYYS  
DGGARPGVTPPAVVSATVGVALLGAVIGNVVFGALGDRVGRRRVYGACLLLM  
VCSSVGSGFSVCRTRRCALASLCFFRFLLGVGVGVDYPLSATIMSEFANRRTR  
GAFIAAVFSMQGFGILASSAVTMAVAAAFDHYTGYPAPLDTPECADLAWRIIL  
MAGAVPAALTYWRMSMPETARYTALVERDVVKATNDIGRVLADLDLGAVA  
EEEVAAAALSRPPPPRPSYGLLSRRFVRQHGRDLFACAAAWFLLDIPYYSSTLF  
QSQIYRPLFPAPGLINAFQEA FNVAKFQAVIAVASTIPGYFVAVLLIDRVGRRL  
QMAGFLLMAVFLFALAGPYDGYWRDHGAHAGYIVLYSLTFFSANLGPNTTTF  
ILPAELFPARFRSTCHGLSGAAGKLGALVGSIGFLWASQQKD GAAAGHLP GIG  
MMYALFVLGGICLLGLALTYVFTPETMMRSLEENESDRAQTQVGDDGSDTEA  
AKSPASMASSHLSMSPILPARVSV

>OsPHT1;11

MADADGGSNLAVLDALDSARTQMYHMKAIIVIAGMGFFTDAYDLFCISTVSK  
LLGRLYYQPDGSTD SKPGALSKTANNMVIGVALVGTLMGQLVFGYFGDKLGR  
KR VYGVTLILMAACAIGSGLSFGSSRKAVIGTLCFFRFWLGF GIGGDYPLSATI  
MSEYSNKKTRGAFIAAVFAMQGVGIIFAGLVSMIVSSIFLTYNKAPSYKGNHDL  
SRQMPAADYVWRIVLMIGAFPALATFYWRMKMPETARYTAIDGNAKQAAN  
DMQKVLSIEIEAEQEKLAKFNAANNYPLLSMEFARRHGLHLIGTTTTWFLLDI  
AFYSQNLTQKDIFPAMGLISGAAEVNALTEMFQISKASFLVALLGTFPGYWVT  
VALIDKMGRYMIQLIGFFMMSMFMLAMGILYDYLKTHHFLFGLLYALTFFFAN  
FGPNSTTFVLP AELFPTRVRSTCH AISAAAGKAGAIVA AFGIQKLTYSQV KSI  
KKALIILSITNMLGFFFTFLVPETMGRSLEEISGEDGNTGAGGGGAPAAANAGV  
GVSASDVSRDEKFPASSTEWQTSMHA

>OsPHT1;12

MGRQDQQLQVLNALDAAKTQWYHFTAIIVAGMGFFTDAYDLFCISLVTKLLG  
RIYYTDPASPTPGSLPPNIAAAVNGVALCGT LSGQLFFGWLGD KLGRKSVYGM  
TLLLMVICSIASGLSFSHTPTSVMATLCFFRFWLGF GIGGDYPLSATIMSEYAN  
KKTRGAFIAAVFAMQGFGILAGGVVTLAMSAGFQA AFPAPAYEVNAAASTVP  
QADYVWRIILMLGALPAILTYWRMKMPETARYTALVAKDAKQASSDMAKV  
LQVEIEVEEEKLQDITRGRDYGLFSARFAKRHGAHLLGTAATWFLVDVAYYSQ  
NLFQKDIFTSIHWIPKARTMSELEE VFRISRAQTLIALCGTVPGYWFTVFLIDIIG  
RFKIQLLG FAGMTAFMLGLAIPYHHWTMPGNQVIFVFLYGFTFFFANFGPNAT  
TFIVPAEIFPARLRSTCHGISAASGKAGAIIGA FGFLYAAQPQDKAHVDAGYKP  
GIGVRNALFVLACNLVGFLMTWMLVPESKGKSLEEMSGEADDEEASANGG



ATAVNSSGVEMV

>OsPHT1;13

MAGNQQLRVLHALDIARTQLYHFIAI VIAGMGFFTDAYDLFSISLVADLLGHV  
YYHGELPRNIHAAVTGIALCGTVPGQLVFGWLGDKMGRKR VYGITLLLMVVS  
SLASGLSFSKHEGMNIIAVLCFFRFWLGVSIGGDYPLSATIMSEYANKRTRGAFI  
AAVFAMQGGFGNLAAGIIGMIVSAAFKHSSASKIDYAWRIILMFGAIPAALTYH  
WRMKMPETARYTALISKNAKKA AKDMSAVLNVNITPDDEVINELARQDEYG  
LFSFEFLHRHGLHLLGTTVCWFVLDVTFYSLNIFMKNIFTEVGLLPRLDSEYH  
HTLQRMITMTAVHTFISLCGALPGYFFTVA FVDRIGRVKIQLIGFTMMTVFMLC  
LAIPYDQWLRHKNKYGFAVMYGLTFFFANFGPNTTTFIIPAEIFPARLRSTCHGI  
SGAVGKIGAIVGVFGFLYTEYHIRIFL FVLIGCNLVGFIFTLLL PESKGKSLEDLT  
GEIEEFQEEDEGSEVALSRPIHTVPL
