# Supplementary material for: Genome-Wide Identification and Characterization of the PHT1 Gene Family and Its Response to Mycorrhizal Symbiosis in Salvia miltiorrhiza under Phosphate Stress
Source: MDPI journal article supplement (doi:10.3390/genes15050589), 2024-05-06
Supplement: s1 [file s1]

**Table S1** RT-qPCR Primer Sequence

| <b>Gene name</b> | <b>Forward primer (5' -3')</b> | <b>Reverse primer (5' -3')</b> |
|------------------|--------------------------------|--------------------------------|
| <i>SmActin</i>   | GGTGCCCTGAGGTCCTGTT            | AGGAACCACCGATCCAGACA           |
| <i>SmPHT1</i>    | TGTCCCGGCTGAGATATTCC           | ATCTGAAACCCAAACGCACC           |
| <i>SmPHT2</i>    | CCCGAGAGAGTTGTGGAAGA           | AAGGCAATGTCGAGGAGGAA           |
| <i>SmPHT3</i>    | CCGAGTACGCCAACAAGAAGACC        | ACCAGACCGCCAGTGAGGATG          |
| <i>SmPHT4</i>    | CTCCGCAAAGACGCAATTCT           | GAGCTTGATGATCGGAGGGA           |
| <i>SmPHT5</i>    | TCTGGCGGATTGTCTTGATGGTTG       | GCGGGCGGTTTCAGGCATC            |
| <i>SmPHT6</i>    | ATCACAAGTGGACCTTCGC            | CGTGTAGTTCTGGATCCCGA           |
| <i>SmPHT7</i>    | GAATCTCCAAGTGCTCGACG           | GTGTAGTAAATGCGGCCGAG           |
| <i>SmPHT8</i>    | CCCTACGATCACTGGACGAA           | CGTCTTCGTCTTGTCCTTGC           |
| <i>SmPHT9</i>    | TGCAGGTGGAGATAGAAGCC           | GCGATTAGGGTTTGAGCTCG           |
