# Supplementary material for: Genome-Wide Identification and Characterization of the PHT1 Gene Family and Its Response to Mycorrhizal Symbiosis in Salvia miltiorrhiza under Phosphate Stress
Source: MDPI journal article supplement (doi:10.3390/genes15050589), 2024-05-06
Supplement: s1 [file s1]

**Table S4** Analysis of cis-elements in SmPHT1 genes

[illegible]

|               |              |                            |   |   |   |   |   |   |   |    |   |
|---------------|--------------|----------------------------|---|---|---|---|---|---|---|----|---|
| light-related | O2-site      | zein metabolism regulation | 0 | 0 | 0 | 0 | 1 | 0 | 1 | 4  | 0 |
|               | circadian    | circadian control          | 1 | 0 | 1 | 0 | 1 | 2 | 0 | 0  | 0 |
|               | ACE          | light- responsive          | 0 | 0 | 0 | 1 | 0 | 0 | 0 | 0  | 2 |
|               | AE-box       | light- responsive          | 0 | 1 | 0 | 0 | 1 | 0 | 0 | 1  | 1 |
|               | ATCT-motif   | light- responsive          | 0 | 0 | 0 | 0 | 0 | 0 | 1 | 1  | 0 |
|               | AT1-motif    | light- responsive          | 0 | 2 | 0 | 0 | 0 | 0 | 0 | 0  | 0 |
|               | Box4         | light- responsive          | 6 | 4 | 4 | 4 | 2 | 3 | 2 | 10 | 3 |
|               | Box II       | light- responsive          | 0 | 0 | 0 | 1 | 0 | 0 | 1 | 0  | 0 |
|               | C-box        | light- responsive          | 0 | 0 | 1 | 0 | 0 | 0 | 0 | 0  | 0 |
|               | CAG-motif    | light- responsive          | 1 | 0 | 0 | 0 | 0 | 0 | 0 | 0  | 0 |
|               | G-Box        | light- responsive          | 1 | 3 | 2 | 2 | 2 | 3 | 4 | 3  | 1 |
|               | G-box        | light- responsive          | 3 | 4 | 4 | 8 | 4 | 8 | 6 | 5  | 6 |
|               | GA-motif     | light- responsive          | 0 | 0 | 0 | 0 | 0 | 0 | 0 | 0  | 2 |
|               | GATA-motif   | light- responsive          | 0 | 0 | 1 | 1 | 0 | 1 | 1 | 2  | 1 |
|               | GT1-motif    | light- responsive          | 1 | 0 | 0 | 1 | 1 | 2 | 2 | 2  | 0 |
|               | Gap-box      | light- responsive          | 0 | 0 | 0 | 1 | 0 | 0 | 0 | 0  | 0 |
|               | I-box        | light- responsive          | 0 | 1 | 0 | 0 | 0 | 0 | 1 | 2  | 0 |
|               | LAMP-element | light- responsive          | 0 | 0 | 0 | 0 | 0 | 0 | 0 | 0  | 1 |
|               | MRE          | light- responsive          | 0 | 0 | 2 | 1 | 0 | 0 | 0 | 0  | 2 |
|               | TCCC-motif   | light- responsive          | 3 | 1 | 1 | 1 | 2 | 0 | 1 | 2  | 1 |
|               | TCT-motif    | light- responsive          | 1 |   | 3 | 3 | 1 | 0 | 1 | 1  | 4 |
|               | chs-CMA1a    | light- responsive          | 1 | 1 |   | 1 | 0 | 1 | 0 | 0  | 0 |
|               | chs-CMA2a    | light- responsive          | 0 | 0 | 1 | 0 | 0 | 0 | 0 | 0  | 0 |
|               | chs-CMA2b    | light- responsive          | 0 | 0 | 0 | 0 | 0 | 1 | 0 | 0  | 0 |

---
