# Supplementary figures and images for: Genome-Wide Identification and Characterization of the PHT1 Gene Family and Its Response to Mycorrhizal Symbiosis in Salvia miltiorrhiza under Phosphate Stress
Source: MDPI journal article supplement (doi:10.3390/genes15050589), 2024-05-06

**Table S3** The sequence information for each motif

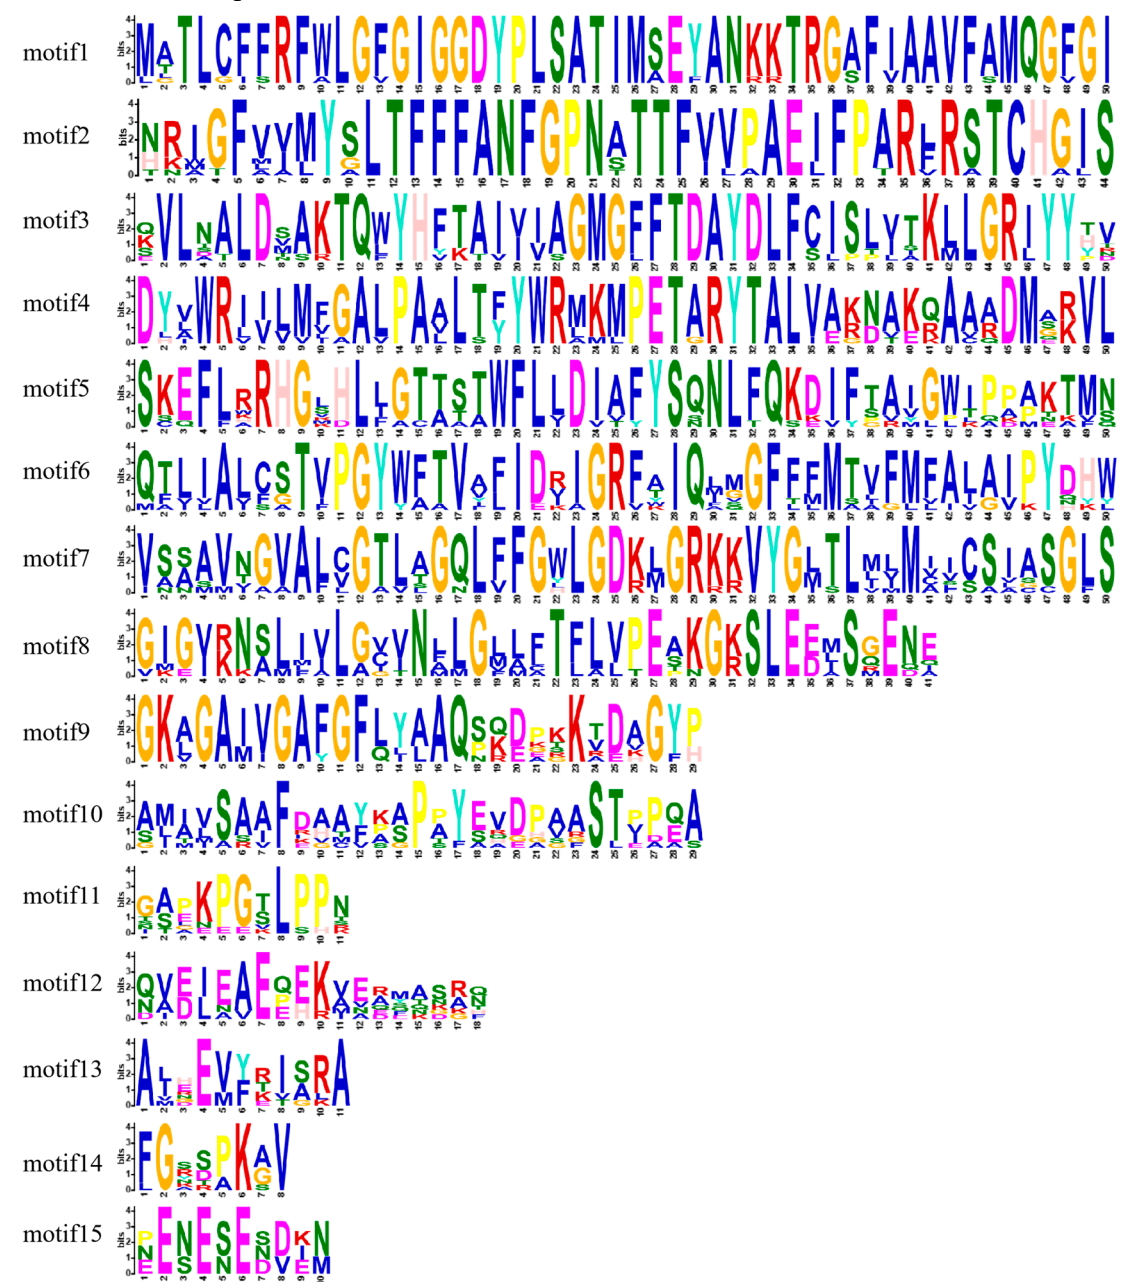

Supplement: s1 [file s1]
